# Supplementary material for: Oxygen uptake efficiency slope in healthy normal weight young males: an applicable framework for calculation and interpretation
Source: PeerJ. 2022 Jul 13;10:e13709. doi: 10.7717/peerj.13709 (PMC9288162; doi:10.7717/peerj.13709)
Supplement: Supplemental Information 2 — The OLP regression plots are described by the linear regression (solid line), the identity (dashed line), the equation and the correlation coefficient (r). [file peerj-10-13709-s002.xlsx]

## Sheet: OUES
				Slope	Intercept			If the 95% CI for a does not include 0, there is fixed bias.				If the 95% CI for b does not include 1.0, there is proportional bias.
mean X	mean Y	mean diif	%diff	b	a	r	R2	a'	lower	upper		b'	lower	upper
3021.59	2906.91	-114.676	-3.79522	0.609359	1065.68	0.562027	0.315874	-369.146	-1247.07	323.231		1.08422	0.855074	1.37477
		0		0.609359	1065.68
										mean diff	-114.676		N=50			TE (%)
										max	1624.7					14.9987
										min	-1105.3
