# Supplementary material for: Oxygen uptake efficiency slope in healthy normal weight young males: an applicable framework for calculation and interpretation
Source: PeerJ. 2022 Jul 13;10:e13709. doi: 10.7717/peerj.13709 (PMC9288162; doi:10.7717/peerj.13709)
Supplement: Supplemental Information 3 — The OLP regression plots are described by the linear regression (solid line), the identity (dashed line), the equation and the correlation coefficient (r). [file peerj-10-13709-s003.xlsx]

## Sheet: OUES ABS
				Slope	Intercept			If the 95% CI for a does not include 0, there is fixed bias.				If the 95% CI for b does not include 1.0, there is proportional bias.
mean X	mean Y	mean diif	%diff	b	a	r	R2	a'	lower	upper		b'	lower	upper
3021.59	3007.53	-14.062	-0.465384	0.880206	347.905	0.92698	0.859292	138.401	-190.344	433.35		0.949542	0.851928	1.05834
													mean diff	-14.062				TE (%)			N=50
													max	858				5.90609
													min	-416
