# Supplementary material for: Oxygen uptake efficiency slope in healthy normal weight young males: an applicable framework for calculation and interpretation
Source: PeerJ. 2022 Jul 13;10:e13709. doi: 10.7717/peerj.13709 (PMC9288162; doi:10.7717/peerj.13709)
Supplement: Supplemental Information 6 [file peerj-10-13709-s006.xlsx]

## Sheet: Raw data 
DOB	ETG	A	H	W	FM	FFM	CPETD
1996-11-02	A	22	185.5	87	16.0791	70.9435	12.1
1997-03-06	A	22	173	75.25	13.5157	61.7343	11.5
1997-12-07	A	21	173.5	75.3575	12.4146	62.9429	10.3
1996-12-26	A	22	181	80.9142	13.8225	67.0917	9.5
1996-08-03	A	22	174	69.8631	11.1014	58.7617	11.3
1997-03-20	A	22	171	72.5353	12.5683	59.9671	8
1997-07-09	A	21	185	90.2643	18.8634	71.4009	12.2
2001-03-23	A	20	176	73.4249	14.8082	58.6167	11.2
2001-01-26	A	20	173	80.9193	14.7211	66.1982	10.5
2001-08-19	A	20	179.8	71.1229	17.7084	53.4145	9.2
2002-03-23	B	17	173	67.8	10.5	57.3	13
2000-11-23	B	19	182	74.2	16.8	57.4	12
2001-12-02	C	17	180	76.9	14.1	62.8	14
2004-05-21	C	15	175.6	72.5	18.7	53.8	14
2000-05-19	C	19	187.2	81.5	19.5	62	13
2001-01-25	C	18	171	51.5	8	43.5	10
2004-08-14	C	15	169.3	53.6	13.8	39.8	9
2005-10-22	C	14	170	46	6	40	8
2002-03-13	C	17	178	69.4	10.4	59	12
2003-12-20	C	15	186.3	73.3	15.6	57.7	11.3
2004-11-10	C	15	169.9	49	7.3	41.7	13
2005-04-11	C	14	168	69.2	8.5	60.7	11
2005-03-15	B	14	184	72	12.6	59.4	12
2005-09-21	B	14	178	73.5	10.7	62.8	11
2005-12-12	C	14	168.2	74.5	17.9	56.6	11
2005-12-17	C	14	166.7	56	9.6	46.4	9.3
2005-01-18	C	14	187.3	88.4	18	70.4	12
2005-07-26	B	14	178.4	65.4	8.5	56.9	12
2005-05-23	B	14	185.4	66.7	12.3	54.4	10
2004-02-18	C	15	168	56.9	9.8	47.1	11
2005-08-20	C	14	167.5	48.9	9.1	39.8	9
2000-08-24	B	19	198	89	18	71	17.1
2003-10-10	C	14	172	64.6	13.8	50.8	12.4
2001-04-18	C	17	179.5	75.2	11	64.2	17
2001-03-21	C	17	180.5	64.5	17.8	46.7	9.5
2000-10-12	C	17	174	58.9	6.9	52	9.4
2000-11-14	C	17	172.3	77	11.2	65.8	15.3
2002-01-16	C	16	177.6	60.4	8	52.4	11
2000-10-24	C	17	189	74	10.4	63.6	13
2001-11-02	C	16	165	58	6.3	51.7	10.5
2003-07-27	C	15	166.2	67.9	10.5	57.4	14.3
2002-09-08	C	16	174	52.71	8.2	44.51	11.3
2003-12-08	C	15	172	46.9	4.9	42	11.4
2003-06-18	C	16	177.7	65.1	6.7	58.4	15
2003-10-12	C	15	181.5	59	2	57	12.5
2003-01-10	C	16	177.1	74	14.9	59.1	16.1
2003-01-21	C	16	174	56.7	3.6	53.1	15
2001-10-31	C	17	176.5	57	4.8	52.2	15
2002-09-08	C	16	167.2	57	5.3	51.7	11
2001-08-29	C	17	175	79	19.3	59.7	17.1

## Sheet: Codes
Codes and symbols used in the Raw Data
Symbol in database	Explation
DOB	date of birth
	in dd.mm.year format
ETG	Exercise test group
A	25 W incremental test
B	20 W incremental etst
C	15 W incremental test
A	Age in years
	used in analyses the numeric variable
H	Height in cm
	used in analyses the numeric variable
W	weight in kg
	used in analyses the numeric variable
FM	fat mass in kg
	used in analyses the numeric variable
FFM	fat free mass in kg
	used in analyses the numeric variable
CPETD	CPET duration in min
	used in analyses the numeric variable
